# Supplementary material for: Sensitive liquid biopsy monitoring correlates with outcome in the prospective international GPOH-DCOG high-risk neuroblastoma RT-qPCR validation study
Source: PubMed Central journal article supplement (PMC11670466; doi:10.1186/s13046-024-03261-y), 2024-12-26

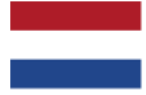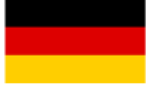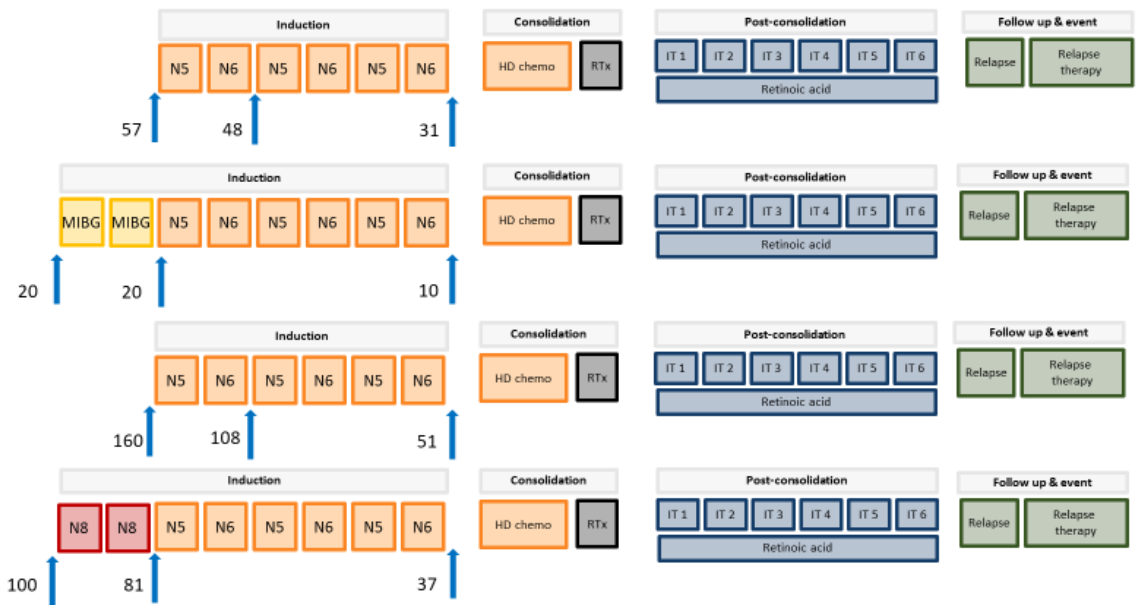

Supplemental Figure 1.

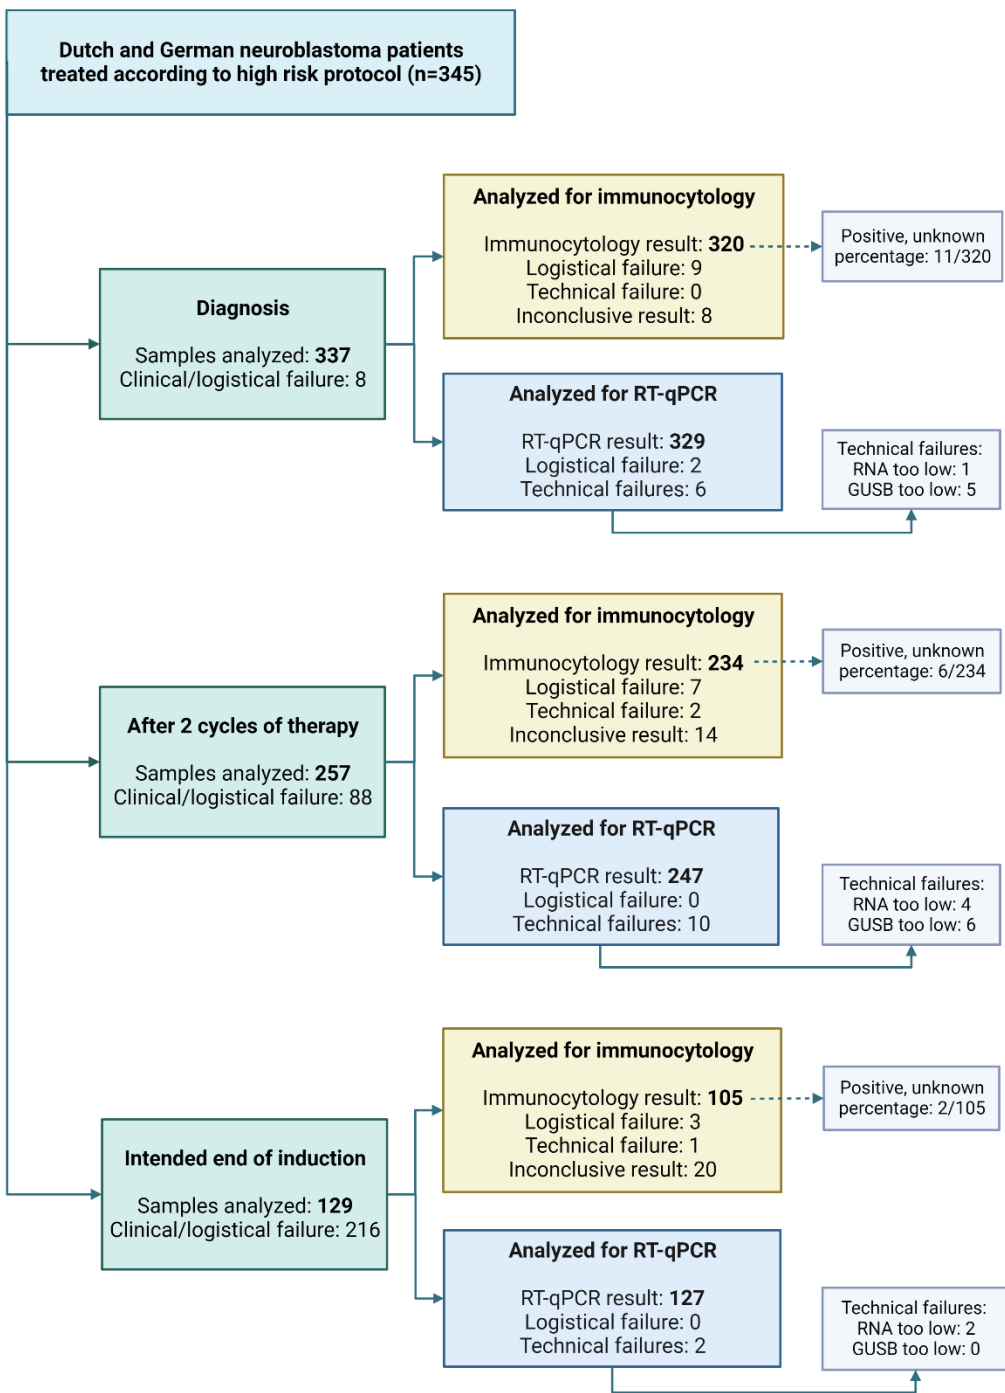

Supplemental Figure 2.

**A**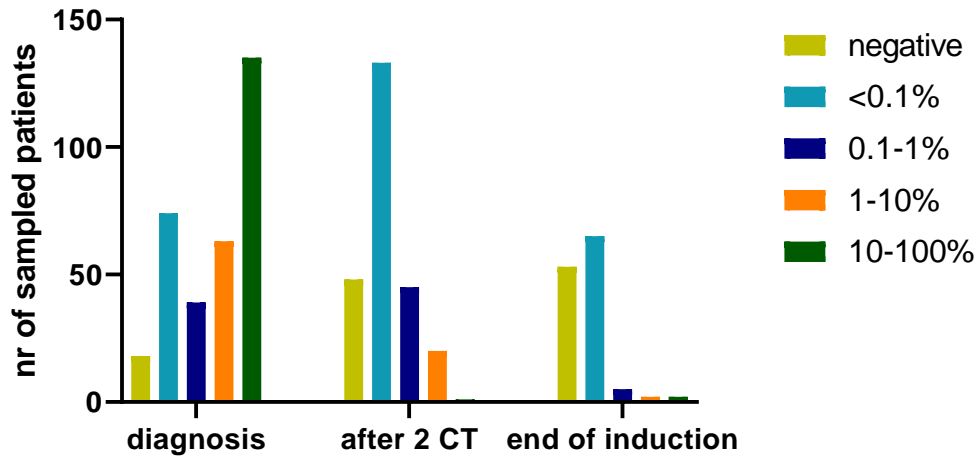**B**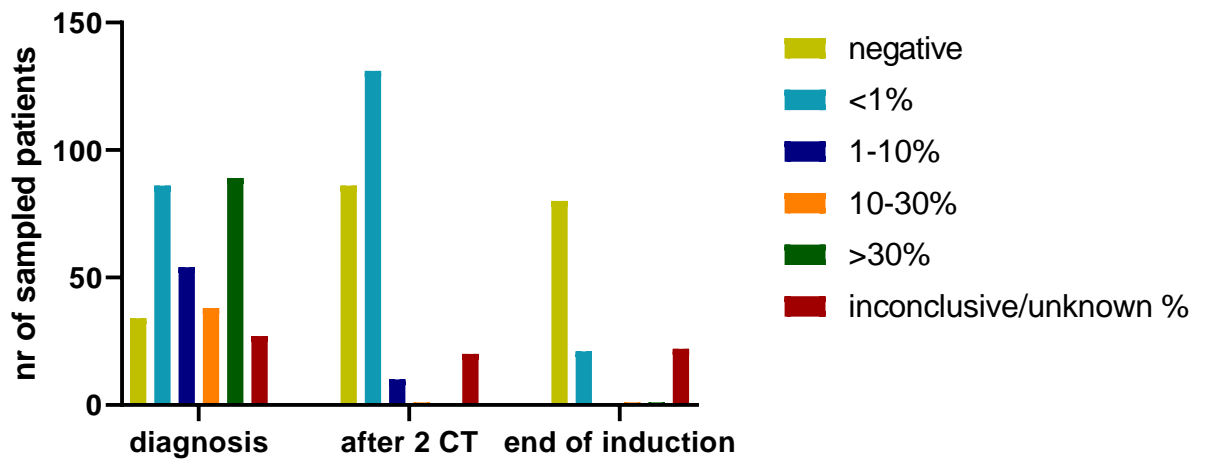

Supplemental Figure 3

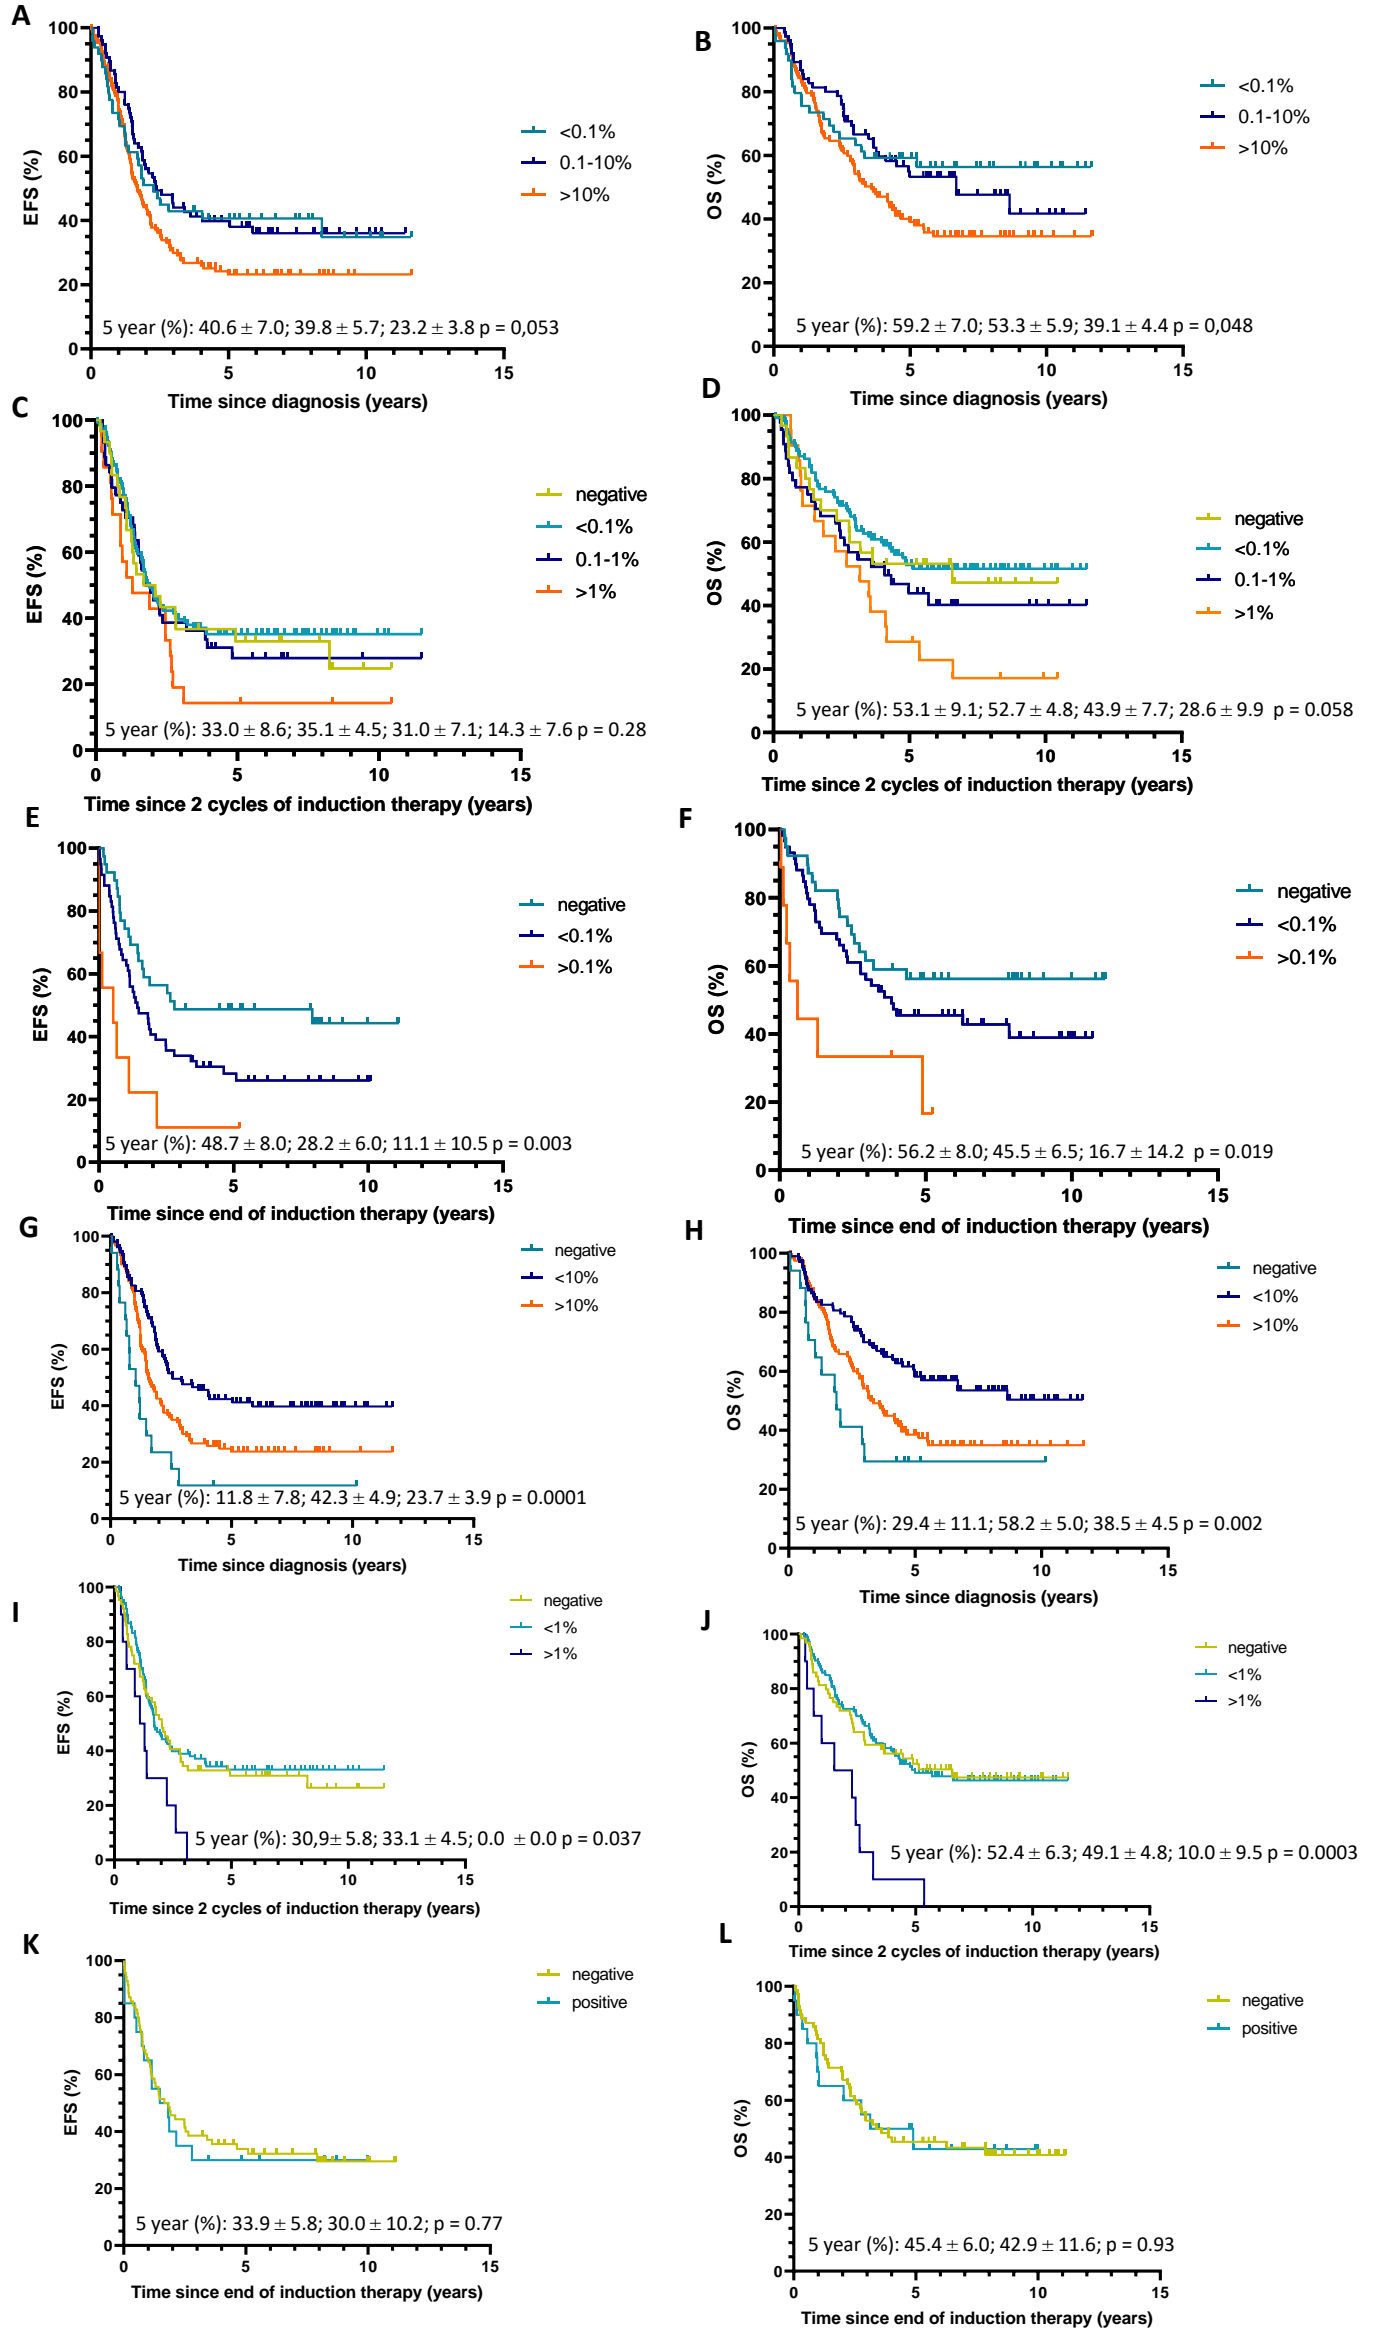

Supplemental Figure 4.

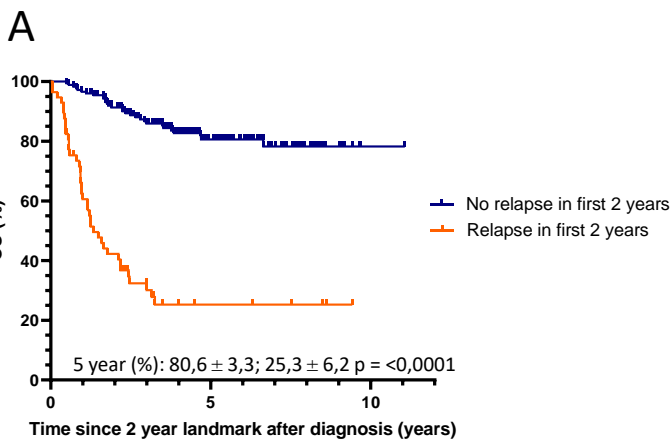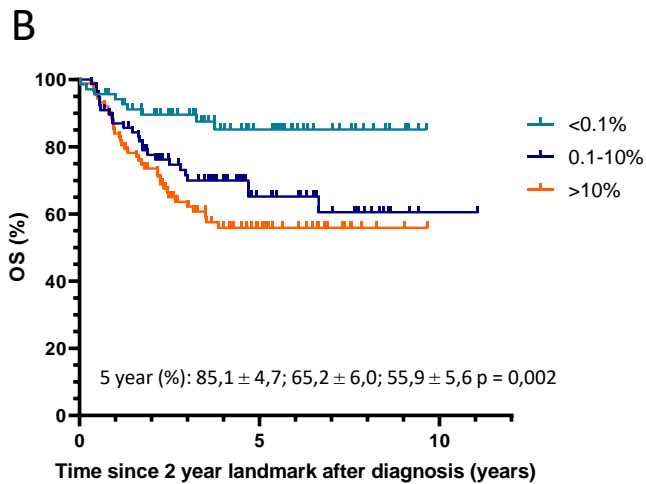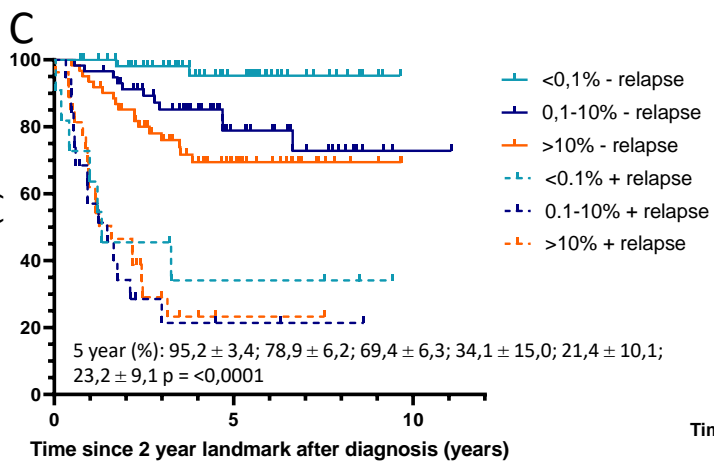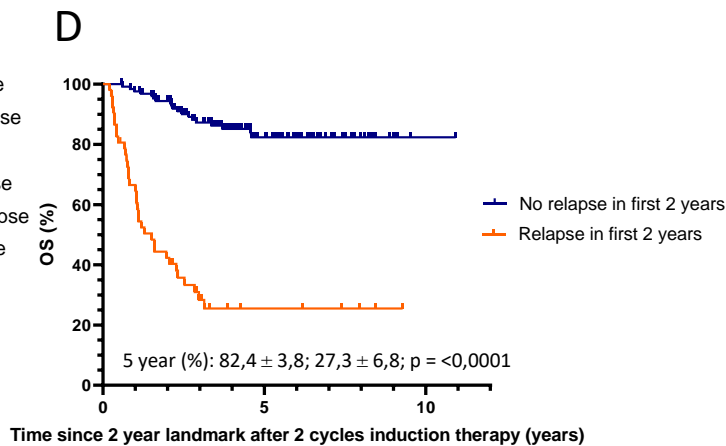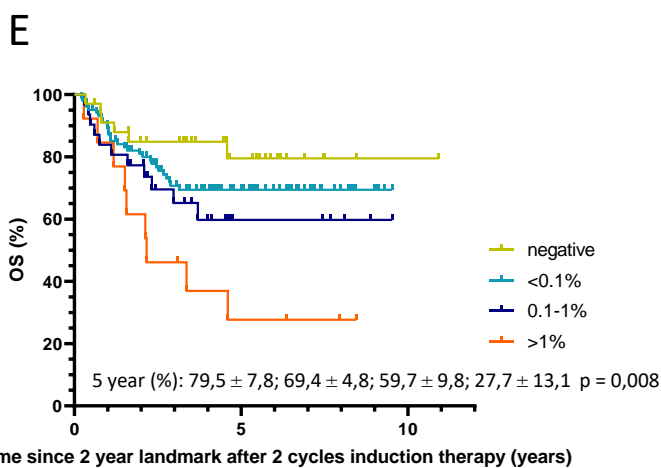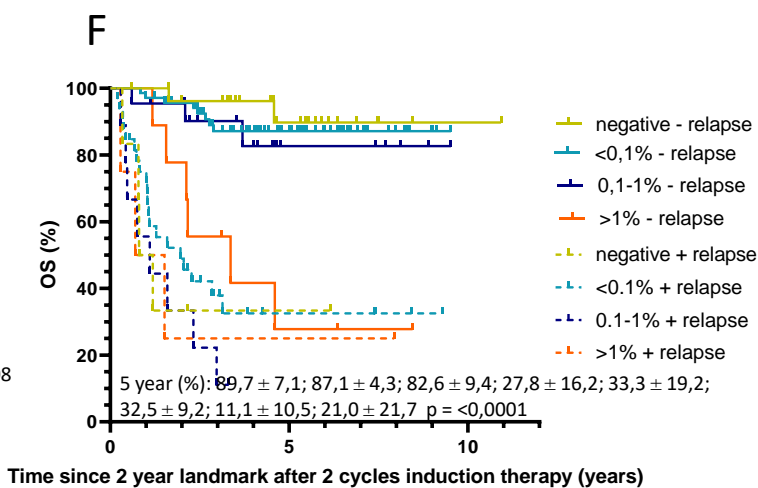

Supplemental Figure 5.

**A**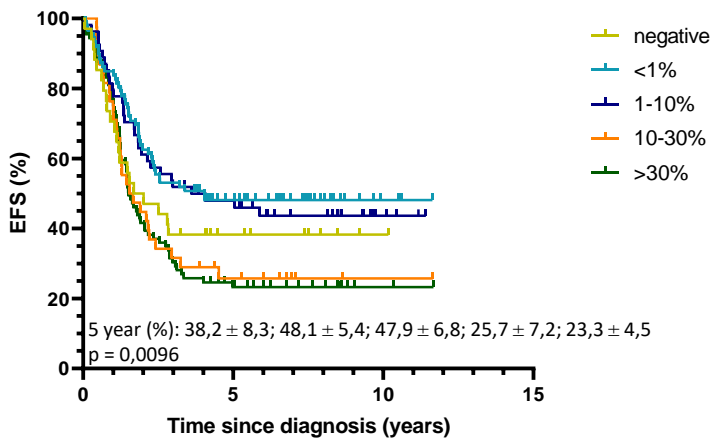**B**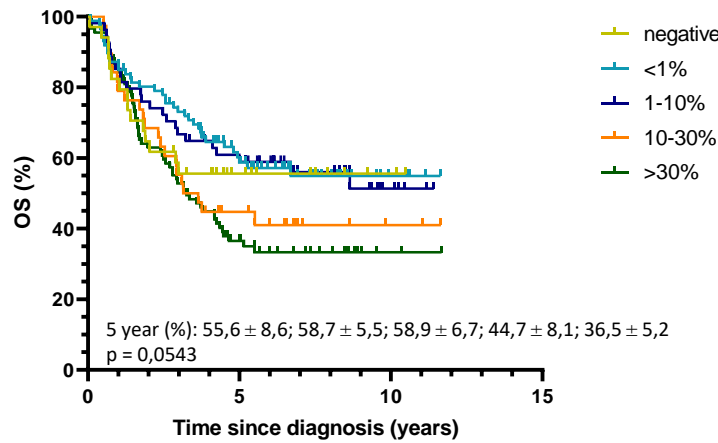**C**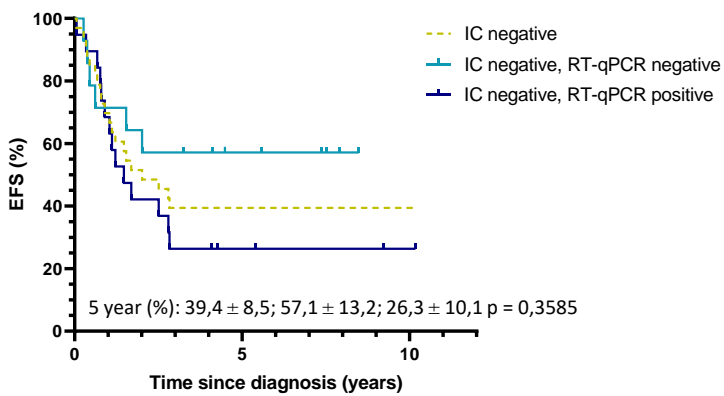**D**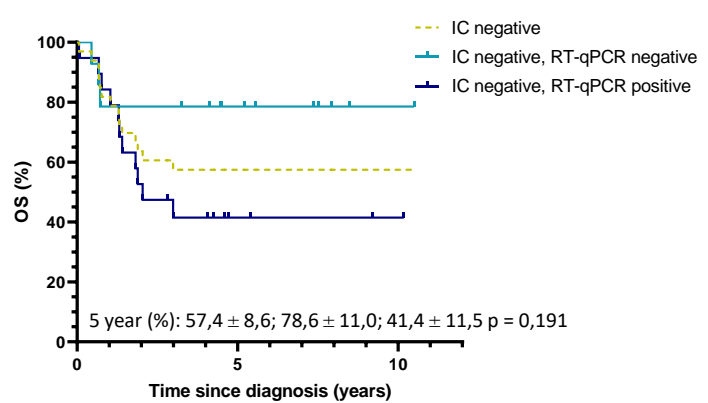**E**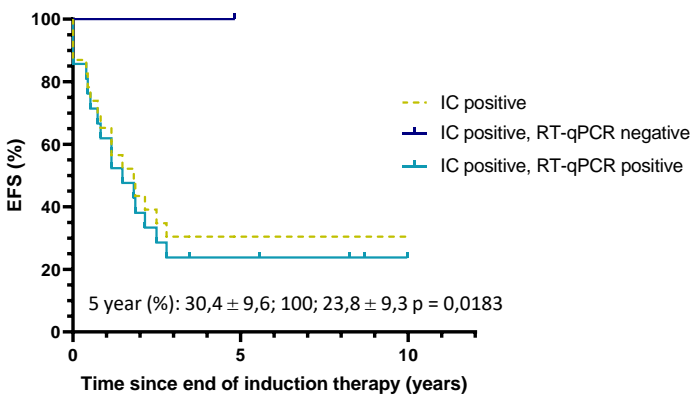**F**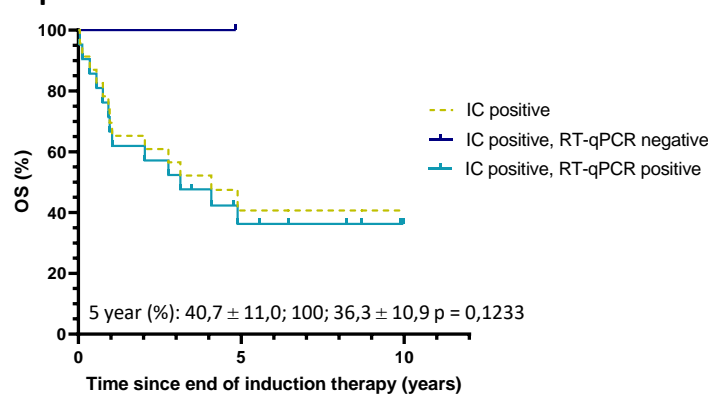**Supplemental Figure 6.**

### PHOX2B

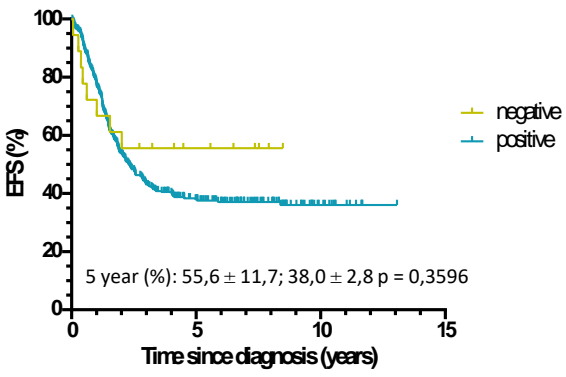

### PHOX2B

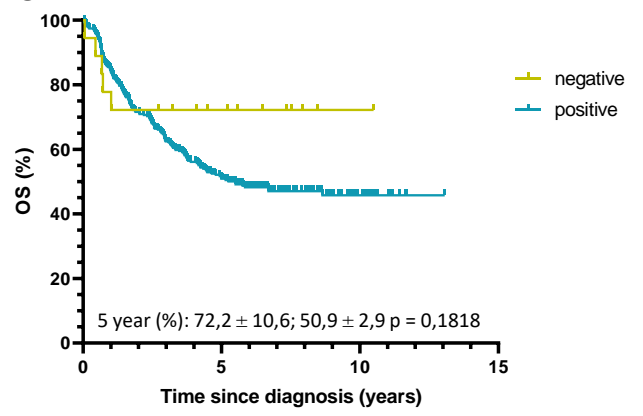

### DDC

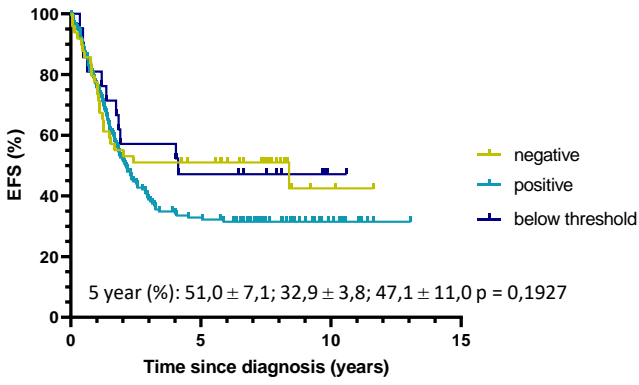

### DDC

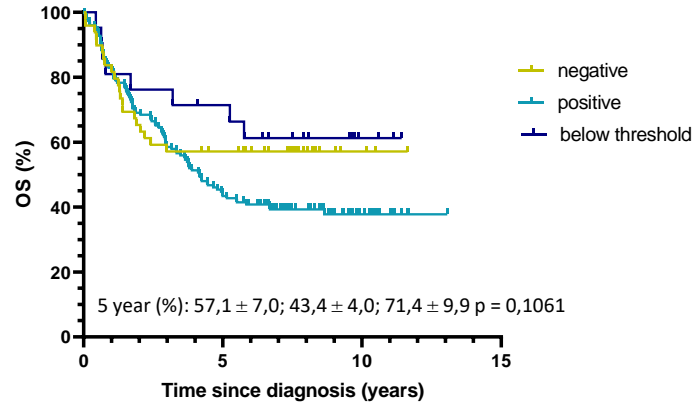

### TH

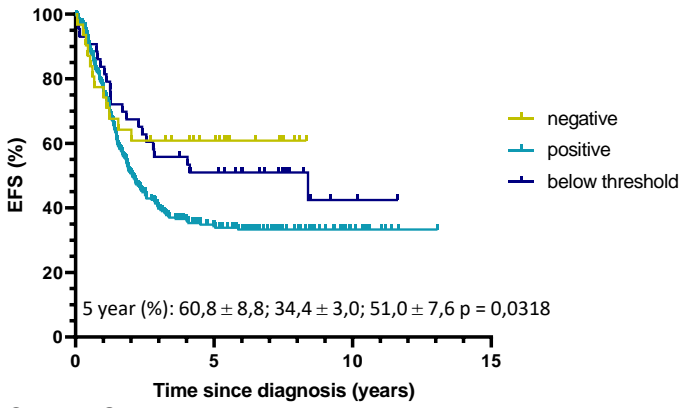

### TH

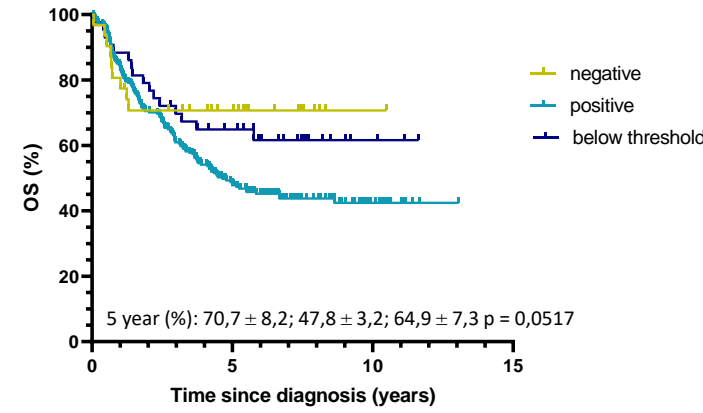

### CHRNA3

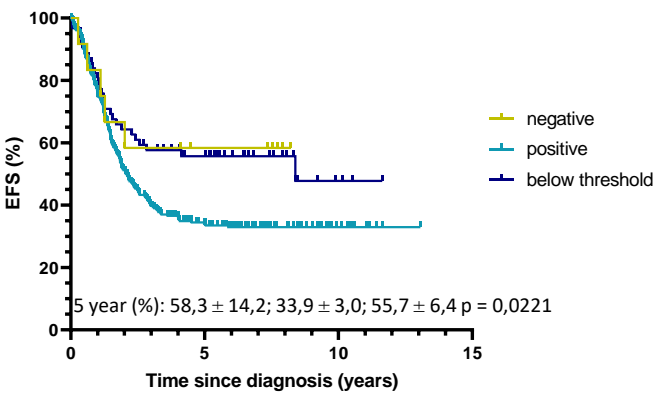

### CHRNA3

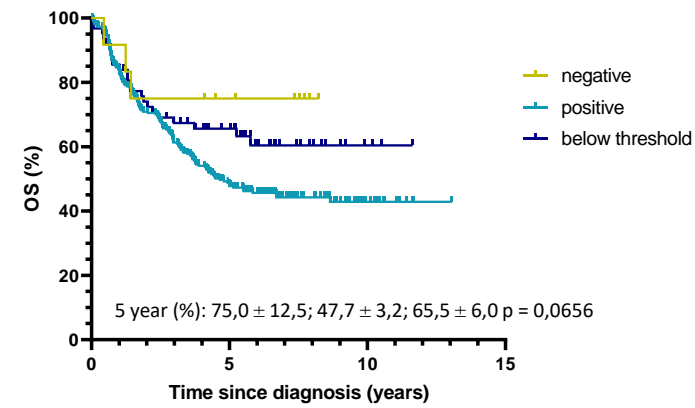

### GAP43

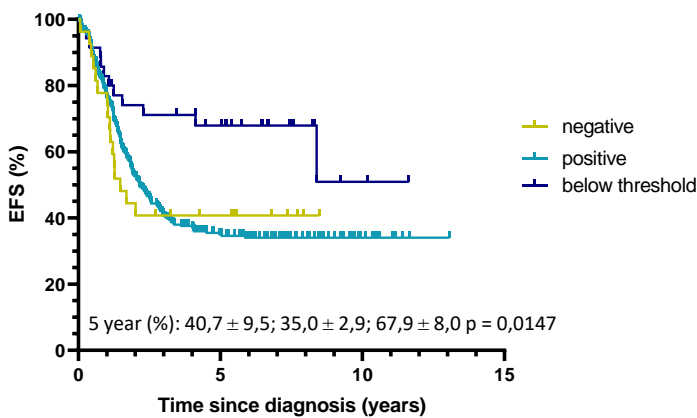

### GAP43

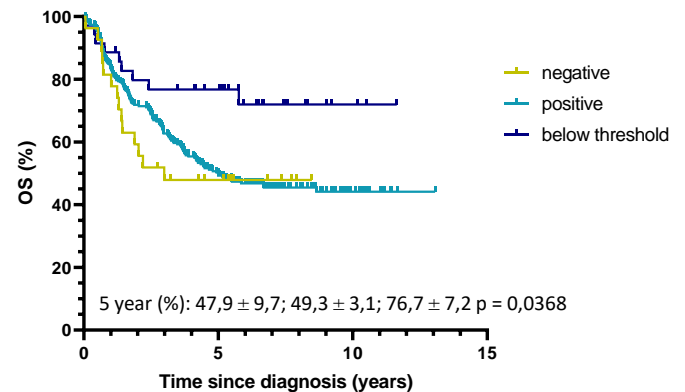

### PHOX2B

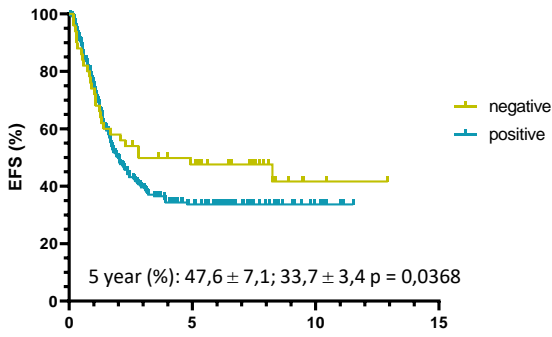

### PHOX2B

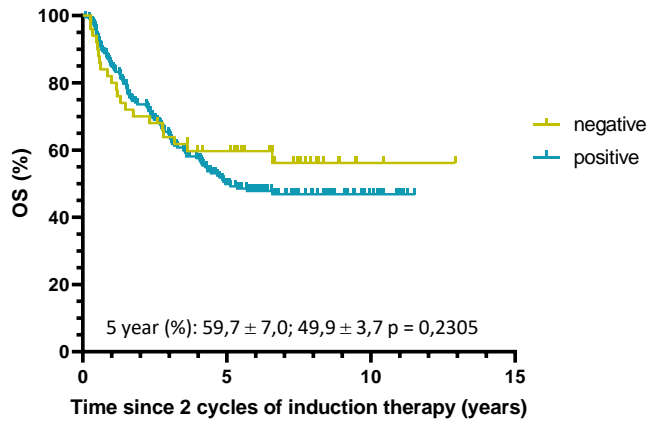

### DDC

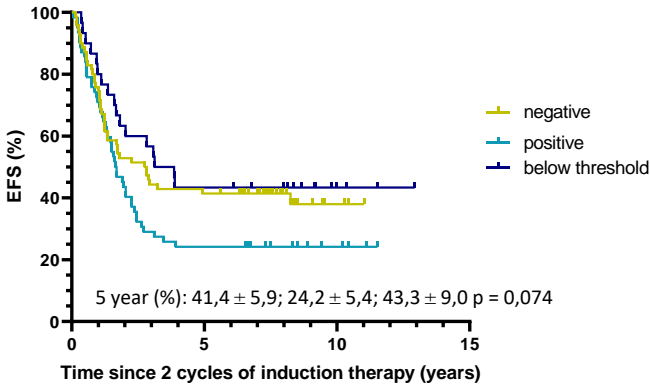

### DDC

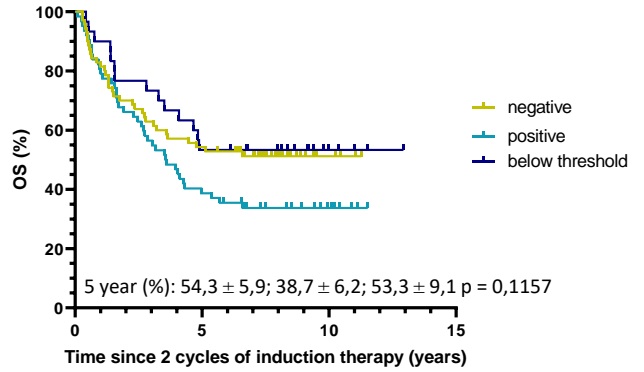

### TH

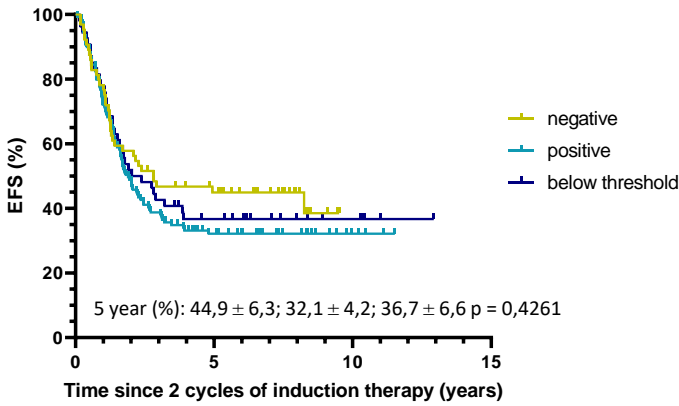

### TH

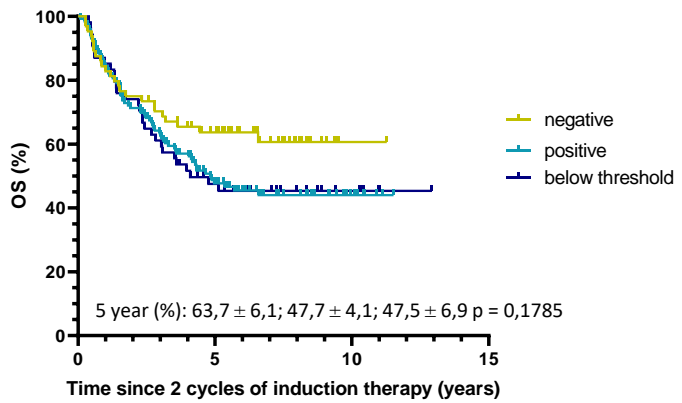

### CHRNA3

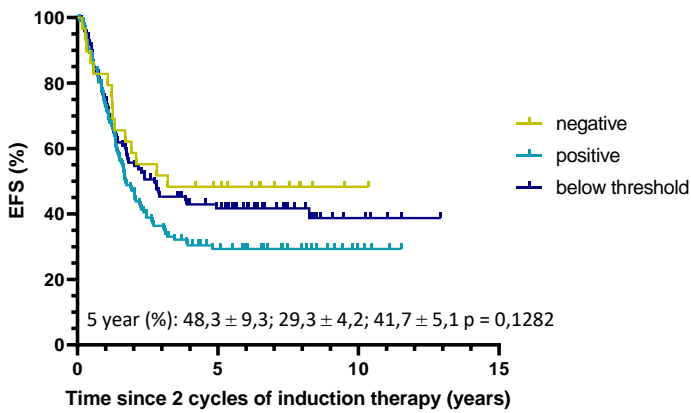

### CHRNA3

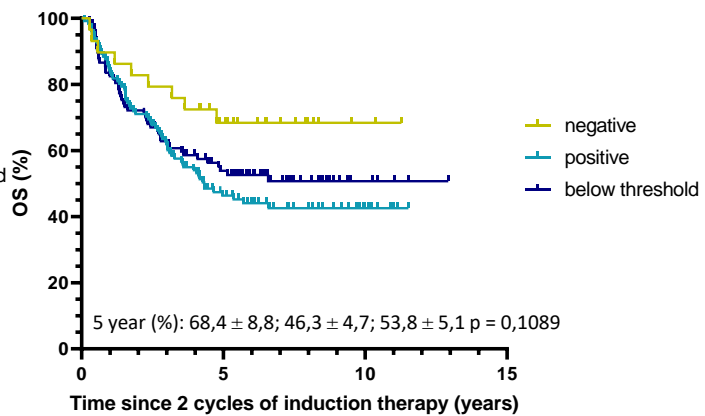

### GAP43

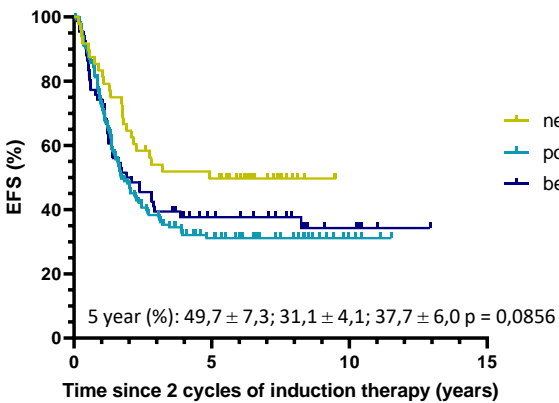

### GAP43

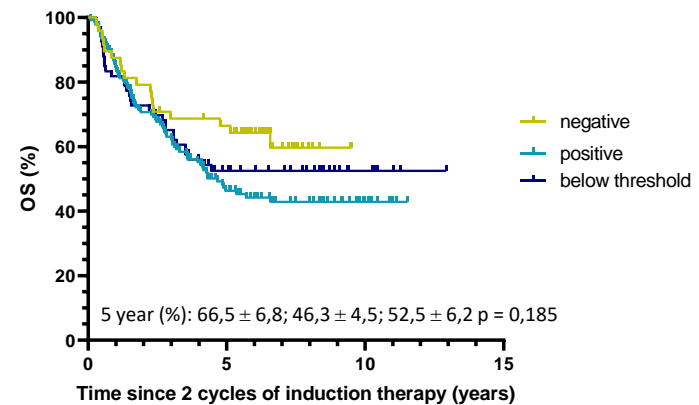



### PHOX2B

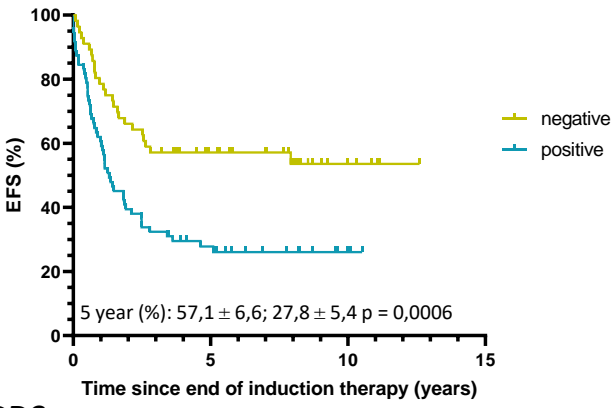

### PHOX2B

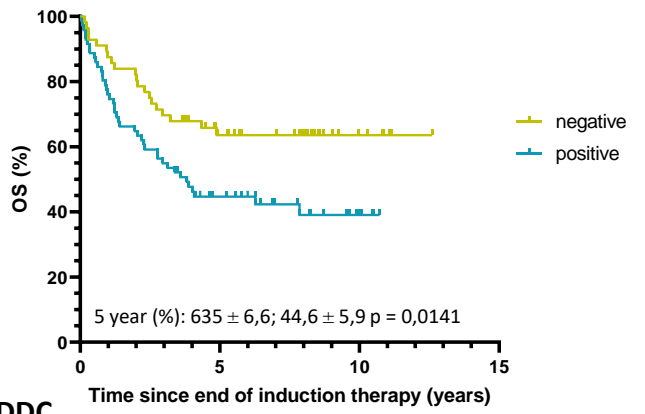

### DDC

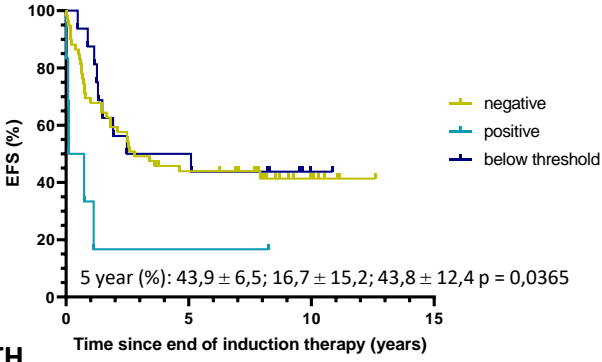

### DDC

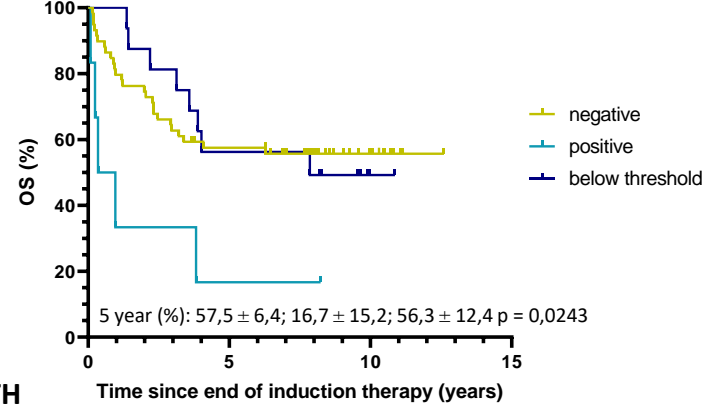

### TH

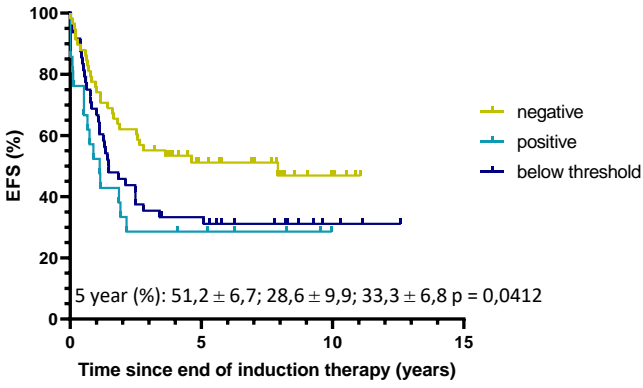

### TH

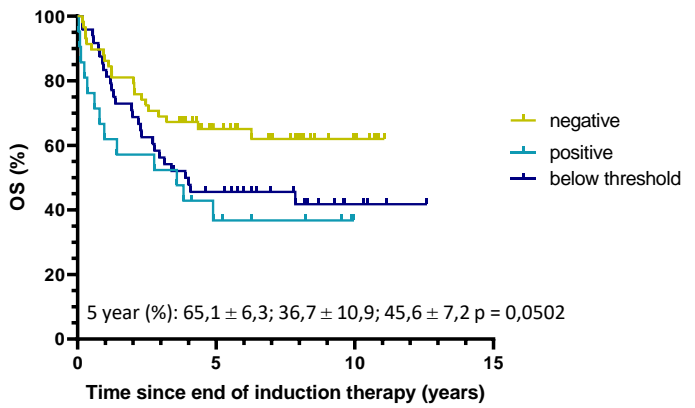

### CHRNA3

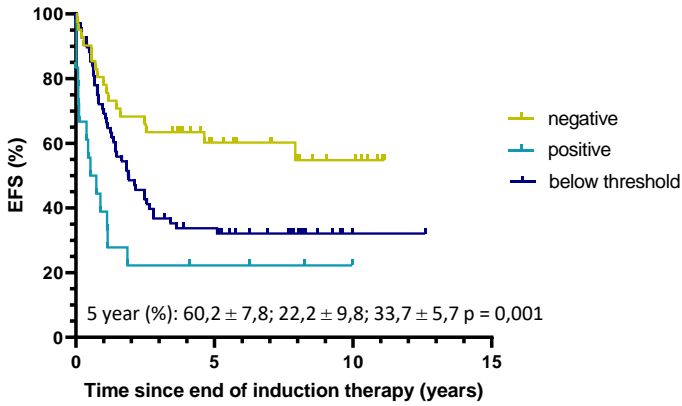

### CHRNA3

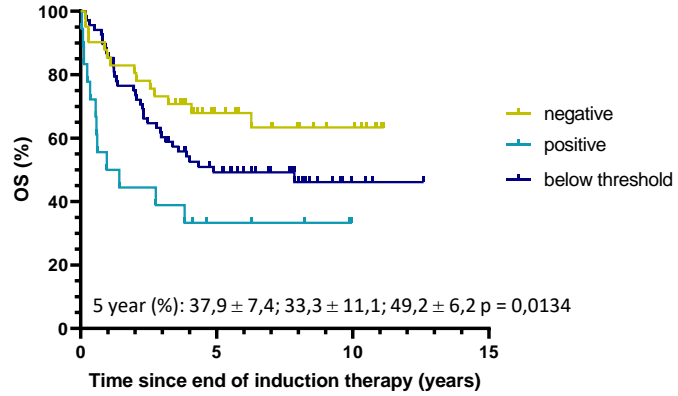

### GAP43

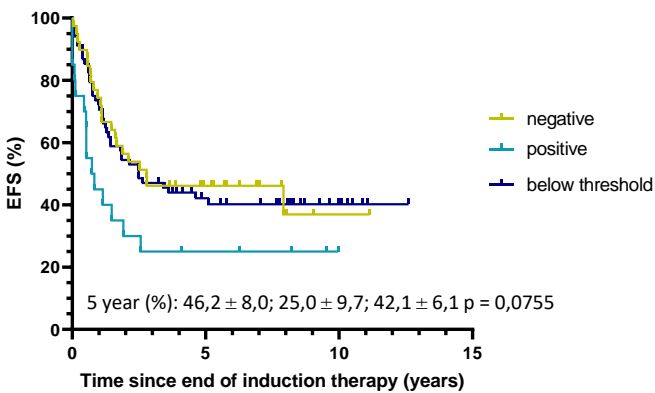

### GAP43

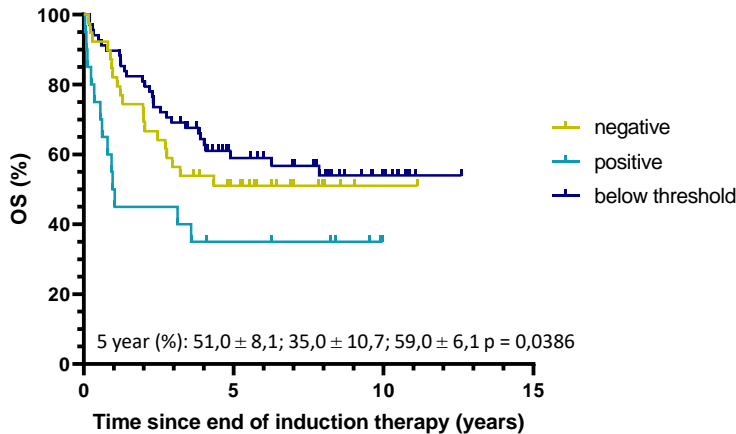

Supplement: 13046_2024_3261_MOESM1_ESM.pdf [file 13046_2024_3261_MOESM1_ESM.pdf]
